# Supplementary material
Source: PubMed Central journal article supplement (PMC7979571)
Supplement: NIHMS1633354-supplement-2.pdf [file NIHMS1633354-supplement-2.pdf]

**Table E1 Supplement: Odds ratios for adherence to lung protective ventilation for demographic and clinical covariables in the control and adoption cohorts combined.**

|                                    | <b>Odds of ordered tidal volume adherent to lung protective ventilation (95% CI)</b> | <b>Odds of delivered tidal volume adherent to lung protective ventilation (95% CI)</b> |
|------------------------------------|--------------------------------------------------------------------------------------|----------------------------------------------------------------------------------------|
| <b>Adoption vs. Control cohort</b> | 2.44 (95% CI 1.96-3.04)                                                              | 1.87 (95% CI 1.49-2.34)                                                                |
| <b>Age, years</b>                  | 1.00 (95% CI 0.99-1.01)                                                              | 1.00 (95% CI 0.99-1.01)                                                                |
| <b>Female vs. Male</b>             | 0.69 (95% CI 0.53-0.90)                                                              | 0.85 (95% CI 0.64-1.11)                                                                |
| <b>Height, inches</b>              | 1.34 (95% CI 1.29-1.40)                                                              | 1.54 (95% CI 1.47-1.62)                                                                |
| <b>SOFA<sup>a</sup></b>            | 1.02 (95% CI 0.99-1.06)                                                              | 1.02 (95% CI 0.99-1.06)                                                                |

Models additionally adjusted for ICU location, Definition of abbreviation: <sup>a</sup>Sequential organ failure assessment

Table E2 Supplement: Focus group results

| RE-AIM Dimension                                                                                                                                                                    | Theme                                           | Focus Group Quotations                                                                                                                                                                                                                                                                                                                                                                         |
|-------------------------------------------------------------------------------------------------------------------------------------------------------------------------------------|-------------------------------------------------|------------------------------------------------------------------------------------------------------------------------------------------------------------------------------------------------------------------------------------------------------------------------------------------------------------------------------------------------------------------------------------------------|
| <b><u>Efficacy</u></b><br>(the proportion of patients receiving volume control IMV <sup>a</sup> with a delivered Vt <sup>b</sup> adherent to LPV <sup>c</sup> )                     |                                                 |                                                                                                                                                                                                                                                                                                                                                                                                |
|                                                                                                                                                                                     | Communication                                   | "...we communicate verbally with the respiratory therapist but we don't end up updating the order"                                                                                                                                                                                                                                                                                             |
|                                                                                                                                                                                     | Reason for ventilator and IMV order discordance | "I could be better at updating my vent settings, but I feel like they're so fluid that we'd be putting in vent orders all day long, especially on some of these patients that we're doing a lot of work on."                                                                                                                                                                                   |
| <b><u>Adoption</u></b><br>(the proportion of patients who had IMV order using the EMR <sup>d</sup> -based LPV order)                                                                |                                                 |                                                                                                                                                                                                                                                                                                                                                                                                |
|                                                                                                                                                                                     | Users' positive reception of the new IMV order  | "I think [the order] guides you and makes sure that you sort of double think before you put it in."<br>"I think the newer set is helpful in that you can just click like 6cc per kilogram and you don't have to look up the height, that part is useful."                                                                                                                                      |
|                                                                                                                                                                                     | Mixed feelings about the benefit of LPV         | "Across the board, I think everyone we put on [a ventilator], we try to do low tidal volume, like 6cc."<br>"[Lung protective ventilation] helps with mortality"<br>"It is unclear if all patients benefit from LPV."<br>"[there is] limited data for [its] use."                                                                                                                               |
| <b><u>Implementation</u></b><br>(the proportion of orders where the prescriber chose a Vt in cc/kg <sup>e</sup> of PBW <sup>f</sup> instead of selecting the 'direct entry' option) |                                                 |                                                                                                                                                                                                                                                                                                                                                                                                |
|                                                                                                                                                                                     | Reason for 'direct entry' option use            | "We calculate 6cc/kg PBW on rounds and then adjust the ventilator...often we have rounded up or down, so the calculated values are not exactly accurate."<br>"Respiratory therapy will ask to have the tidal volumes rounded up or down when ordered as cc/kg, so I started using cc/kg to see what it should be and then switch to direct entry to round to a number RT is comfortable with." |
|                                                                                                                                                                                     | Provider desire to retain autonomy              | "[Using the direct entry option] is faster, easier and enables the physician to take control of the ventilator, rather than an algorithm."                                                                                                                                                                                                                                                     |

Definition of abbreviation: <sup>a</sup>Invasive mechanical ventilation; <sup>b</sup>Tidal volume <sup>c</sup>Lung protective ventilation; <sup>d</sup>Electronic medical record; <sup>e</sup>Cubic centimeters per kilograms; <sup>f</sup>Predicted body weight
